# Supplementary material for: Double crosslinking decellularized bovine pericardium of dialdehyde chondroitin sulfate and zwitterionic copolymer for bioprosthetic heart valves with enhanced antithrombogenic, anti-inflammatory and anti-calcification properties
Source: Royal Society of Chemistry journal article supplement (doi:10.1039/d4tb00074a), 2024-01-01
Supplement: d4tb00074a1.pdf [file d4tb00074a1.pdf]

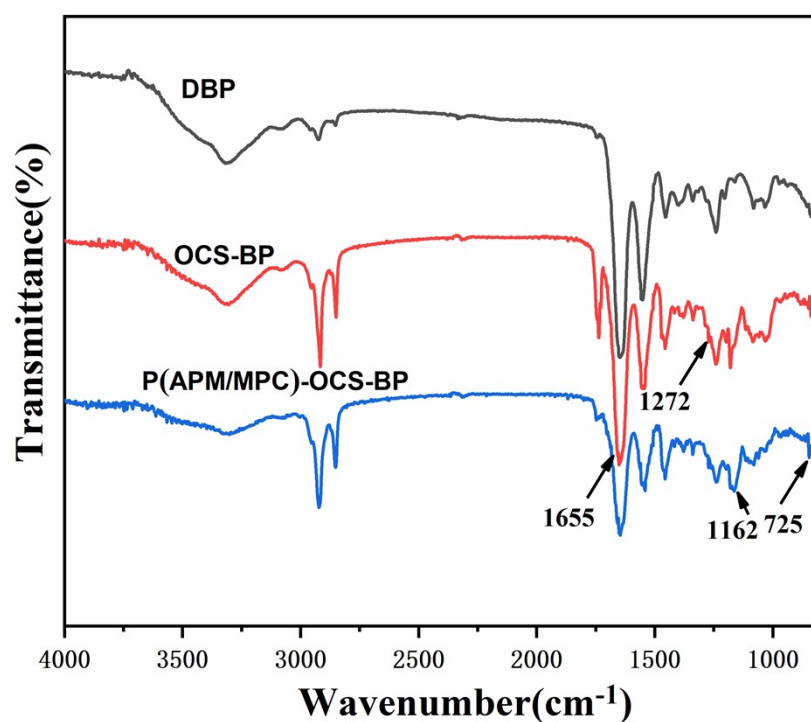

S1. FTIR spectra of DBP, OCS-BP, and P(APM/MPC)-OCS-BP.

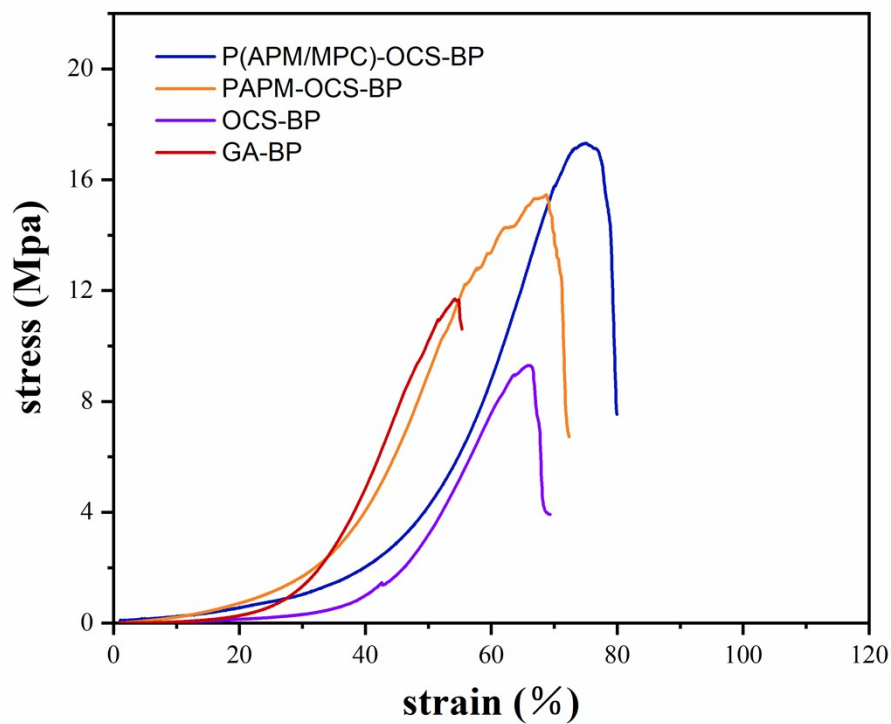

S2. Stress-strain curve of GA-BP, OCS-BP, PAM-OCS-BP, and P(APM/MPC)-OCS-BP.
